# Supplementary material for: Effects of protonation on foaming properties of dodecyldimethylamine oxide solutions: a pH-study
Source: Royal Society of Chemistry journal article supplement (doi:10.1039/c4sm02476a), 2014-11-26
Supplement: c4sm02476a1.pdf [file c4sm02476a1.pdf]

26.10.2014

Submission to *Soft Matter*

*Supplementary Information*

Effects of Protonation on Foaming Properties of  
Dodecyldimethylamine Oxide Solutions: A pH-Study

*Kathrin Schellmann<sup>1</sup>, Natalie Preisig<sup>1</sup>, Per Claesson<sup>2</sup>, Cosima Stubenrauch<sup>1\*</sup>*

<sup>1</sup> Universität Stuttgart, Institut für Physikalische Chemie, Pfaffenwaldring 55,  
70569 Stuttgart, Germany

<sup>2</sup> KTH Royal Institute of Technology, School of Chemical Science and Engineering,  
Department of Chemistry, Division of Surface and Corrosion Science,  
Drottning Kristinas väg 51, Stockholm, SE-100 44 Sweden

**Keywords:** dodecyldimethylamine oxide; pH-dependent surfactant properties; crucial role of hydrogen bonds; foamability; foam stability

**\*Corresponding Author:** [cosima.stubenrauch@ipc.uni-stuttgart.de](mailto:cosima.stubenrauch@ipc.uni-stuttgart.de);

Phone: +49-711-685-64470

### A: All Experimental Runs of the Foam Study

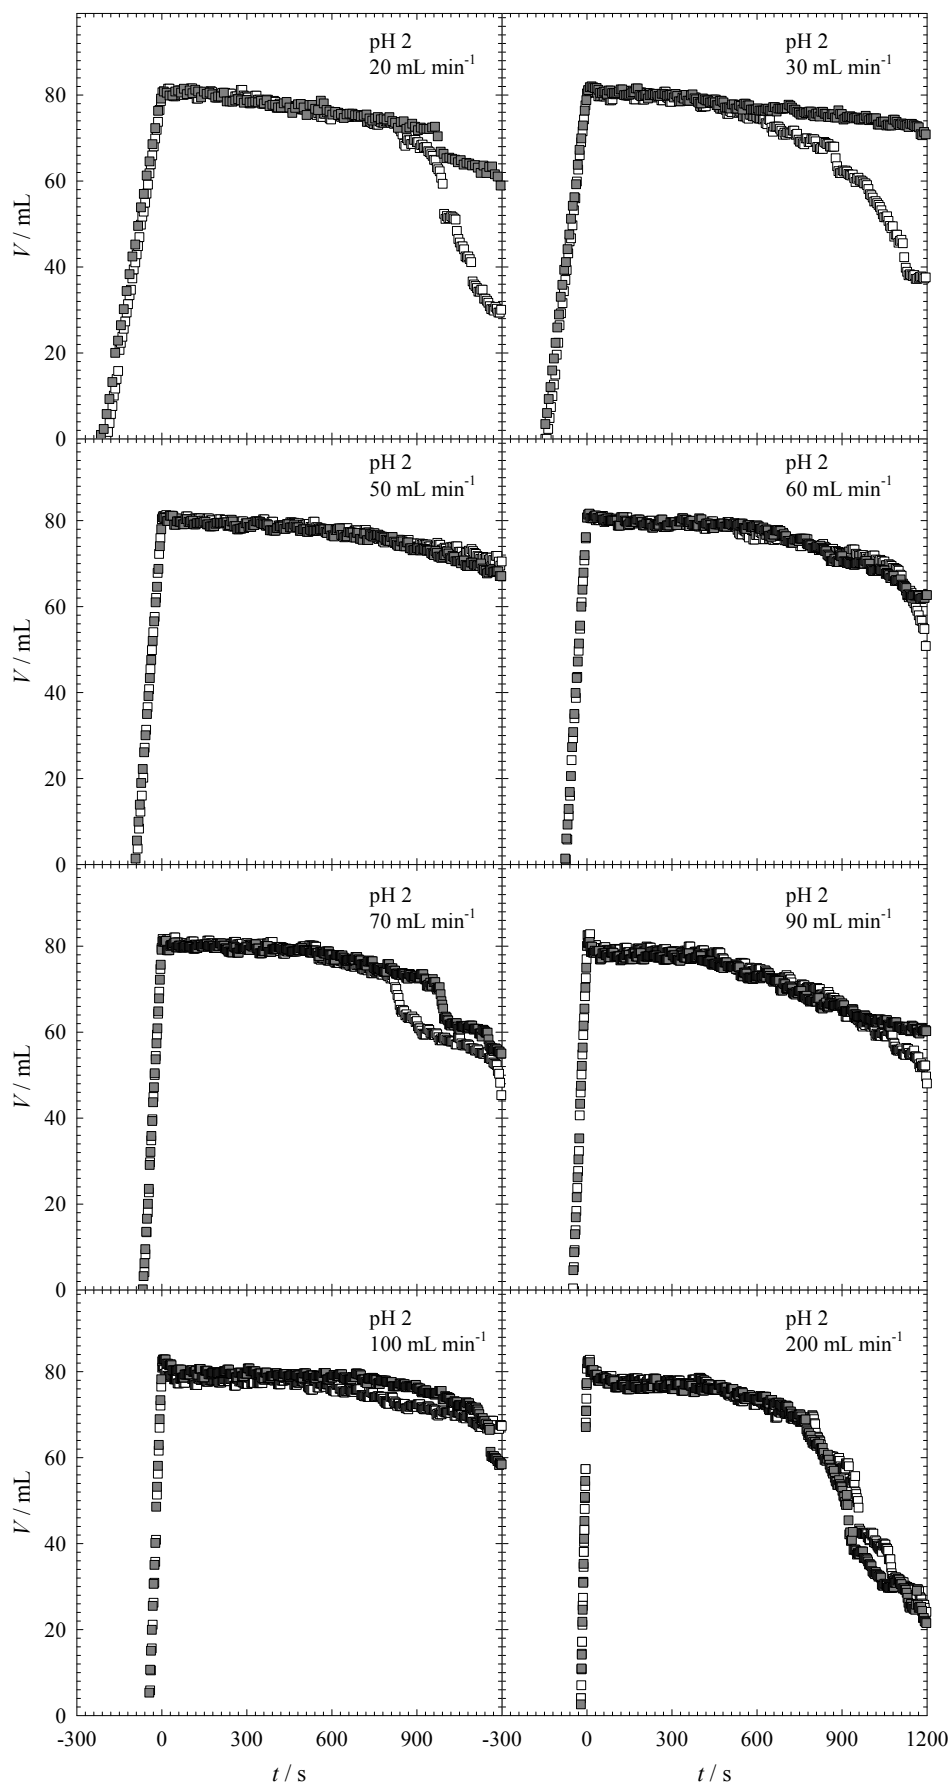

**Figure S1:** Reproducibility of measuring the foam volume as a function of time for foams generated at different flow rates  $Q = 20, 30, 50, 60, 70, 90, 100$  and  $200 \text{ mL min}^{-1}$  and pH of 2 ( $\square$  – run 1,  $\blacksquare$  – run 2).

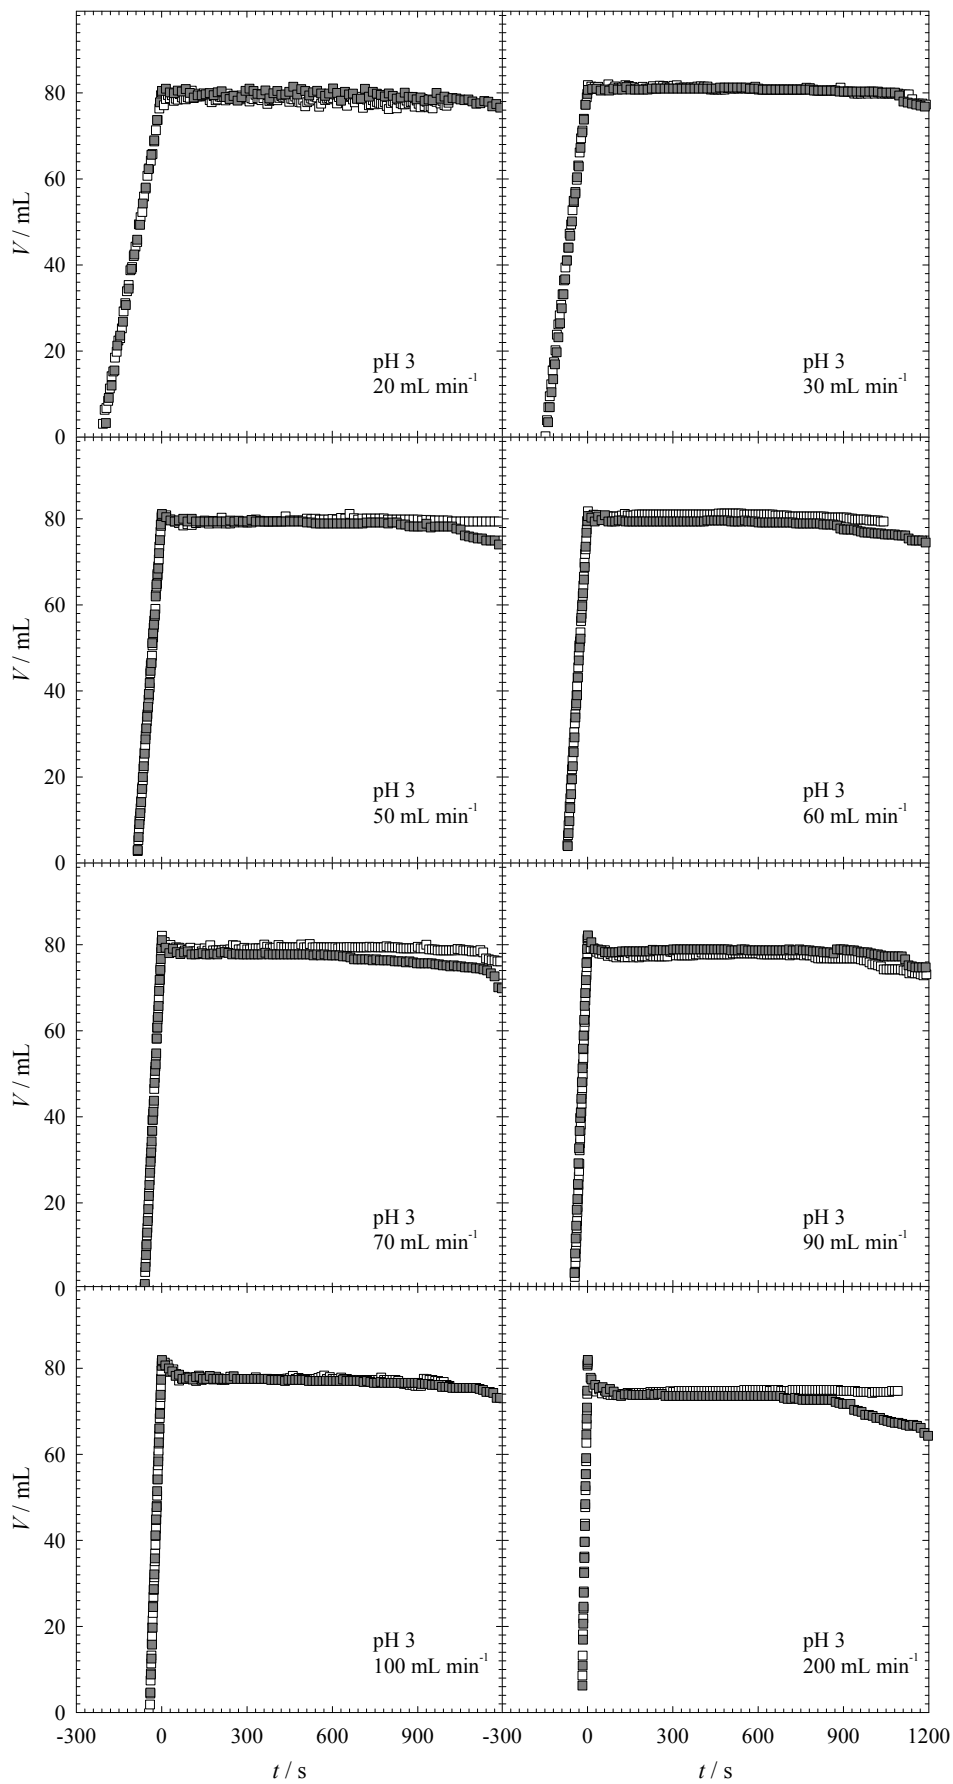

**Figure S2:** Reproducibility of measuring the foam volume as a function of time for foams generated at different flow rates  $Q = 20, 30, 50, 60, 70, 90, 100$  and  $200 \text{ mL min}^{-1}$  and pH of 3 ( $\square$  – run 1,  $\blacksquare$  – run 2).

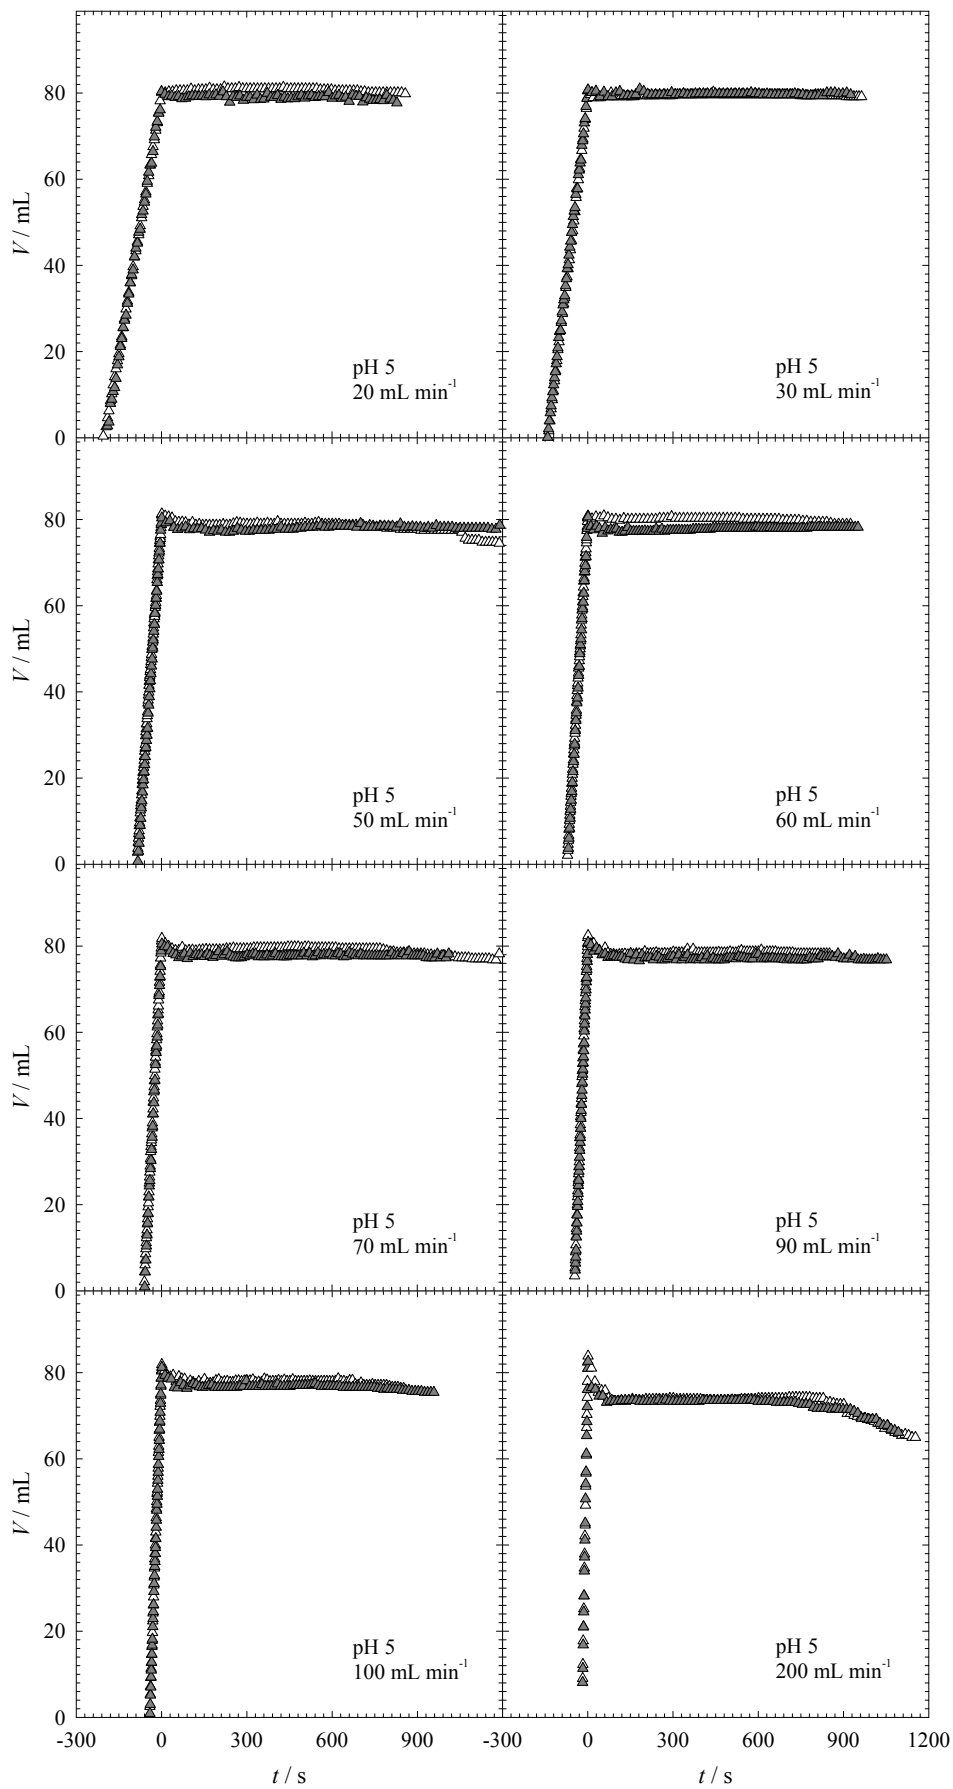

**Figure S3:** Reproducibility of measuring the foam volume as a function of time for foams generated at different flow rates  $Q = 20, 30, 50, 60, 70, 90, 100$  and  $200 \text{ mL min}^{-1}$  and pH of 5 ( $\Delta$  – run 1,  $\blacktriangle$  – run 2).

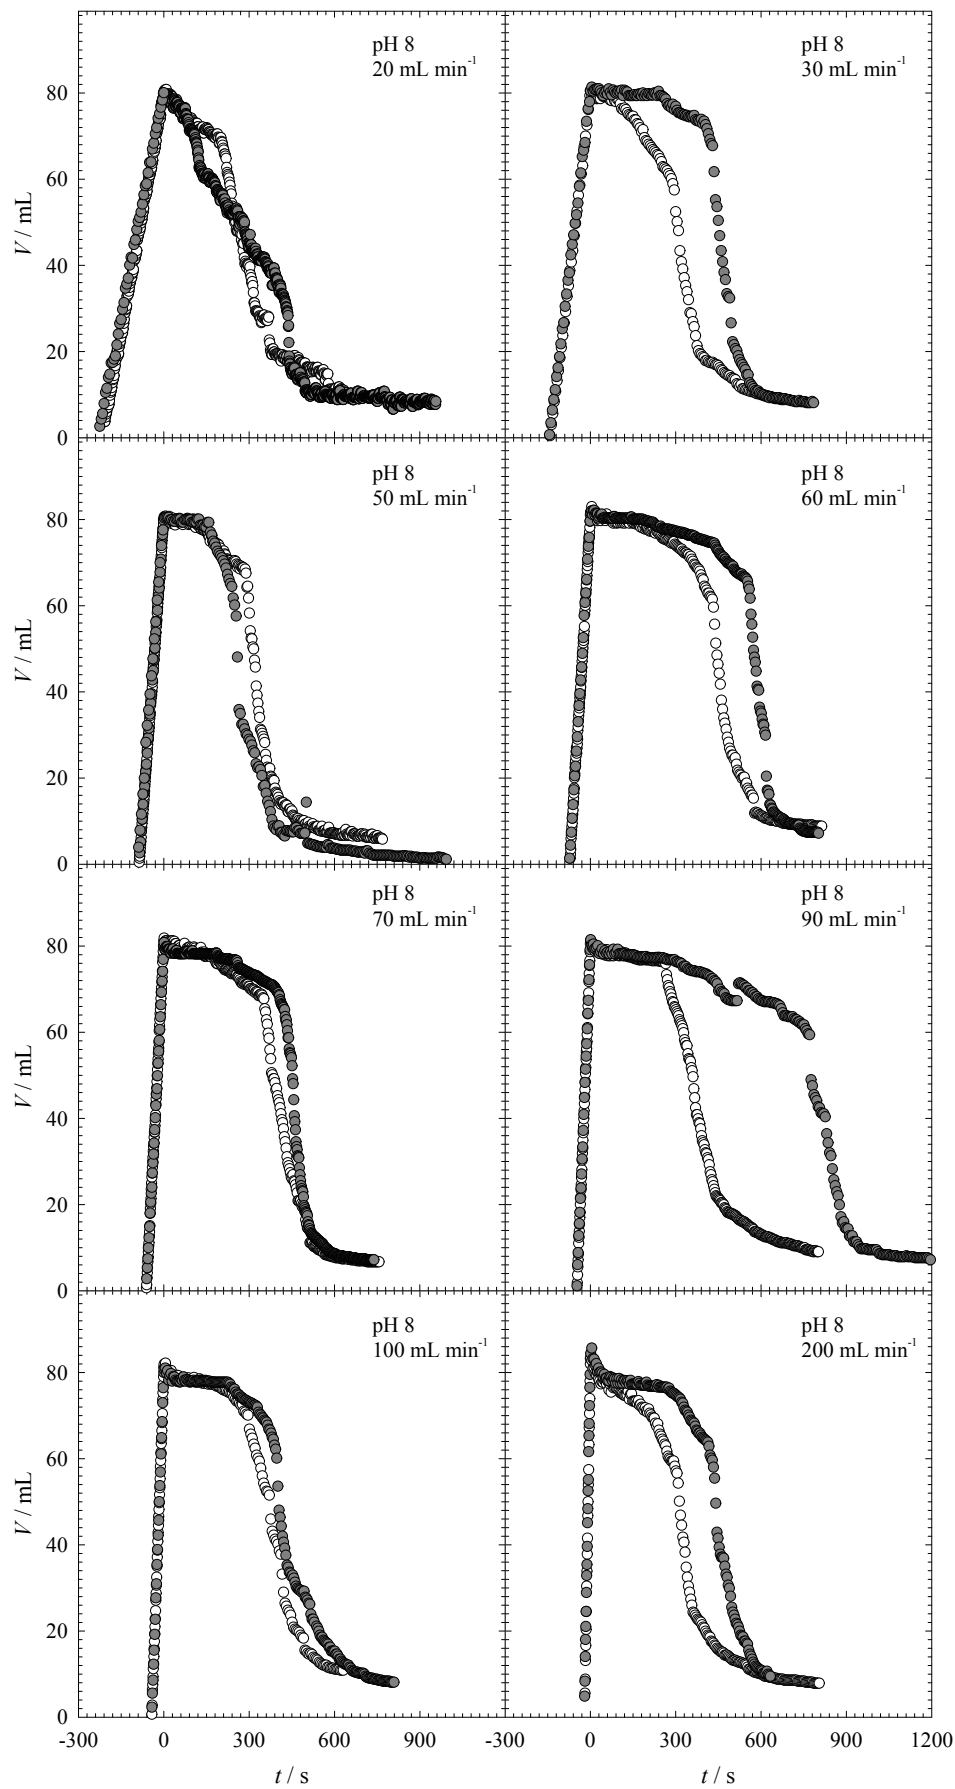

**Figure S4:** Reproducibility of measuring the foam volume as a function of time for foams generated at different flow rates  $Q = 20, 30, 50, 60, 70, 90, 100$  and  $200 \text{ mL min}^{-1}$  and pH of 8 ( $\circ$  – run 1,  $\bullet$  – run 2).

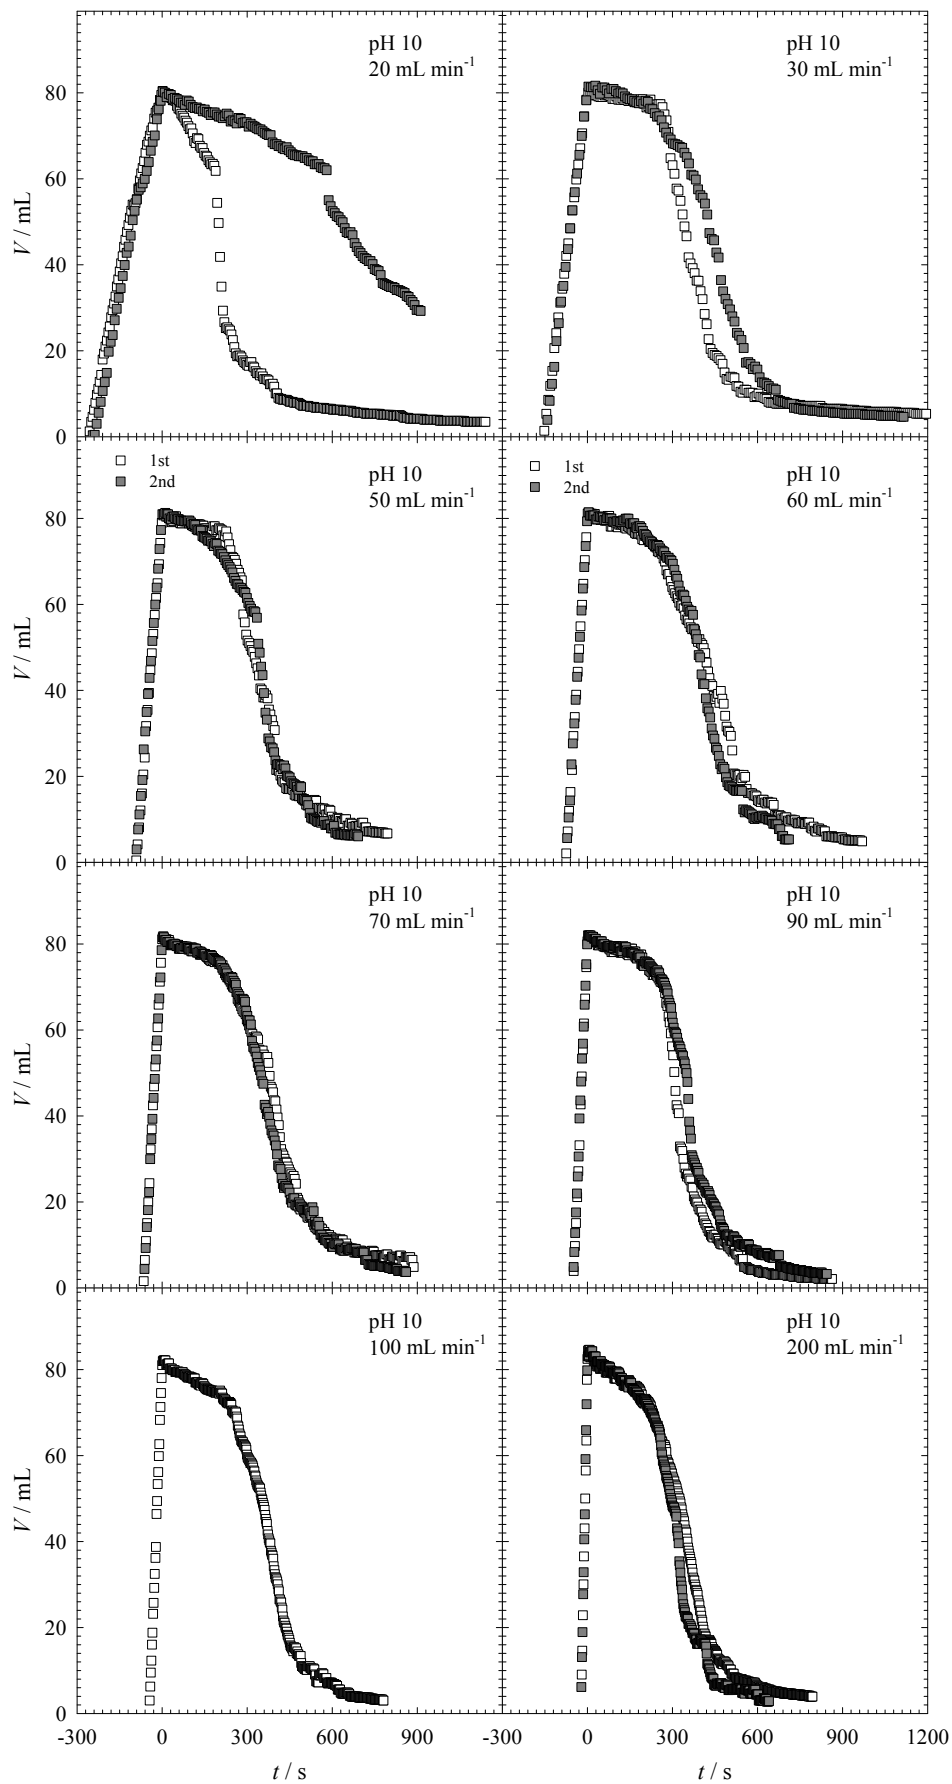

**Figure S5:** Reproducibility of measuring the foam volume as a function of time for foams generated at different flow rates  $Q = 20, 30, 50, 60, 70, 90, 100$  and  $200 \text{ mL min}^{-1}$  and pH of 10 ( $\square$  – run 1,  $\blacksquare$  – run 2).

## B: Dependence between Degree of Ionization and pH-value

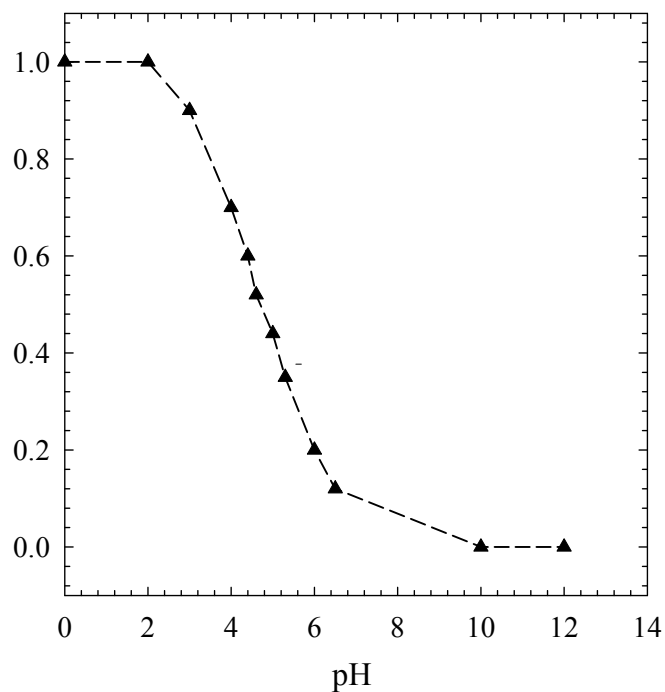

**Figure S6:** Dependence of the degree of ionization  $\alpha$  on the pH-value. Data are extracted from [1].

- [1] H. Maeda, S. Muroi, M. Ishii, R. Kakehashi, H. Kaimoto, T. Nakahara, K. Motomura, J. Colloid Interface Sci. 175 (1995) 497.
